# Supplementary material for: Successful Profiling of Plasmodium falciparum var Gene Expression in Clinical Samples via a Custom Capture Array
Source: PubMed Central journal article supplement (PMC8631312; doi:10.1128/msystems.00226-21), 2021-11-30

**De novo reference****Genomic reference**

UM 1

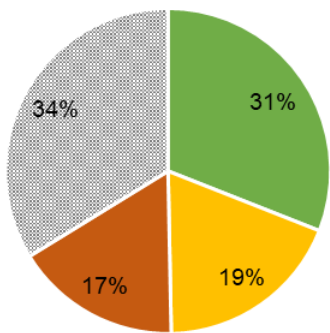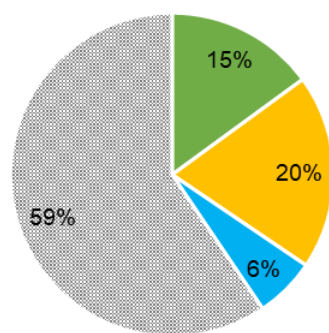

UM 2

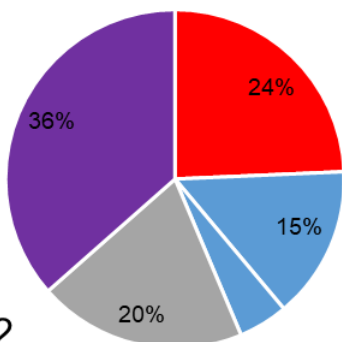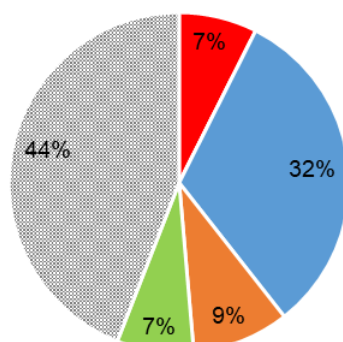

UM 3

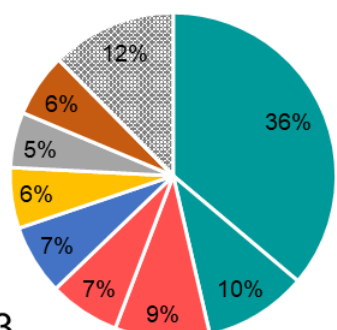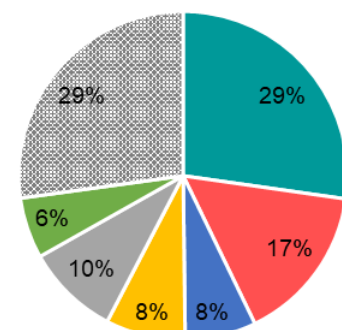

UM 5

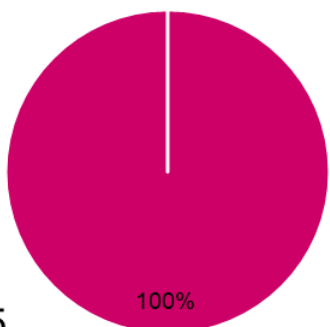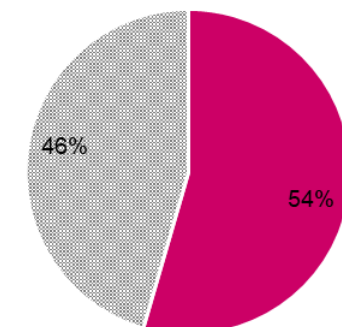

UM 6

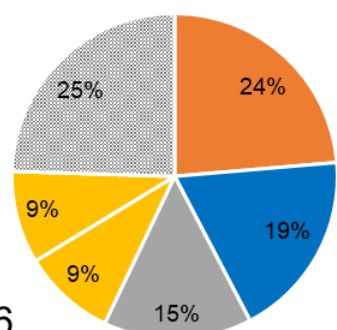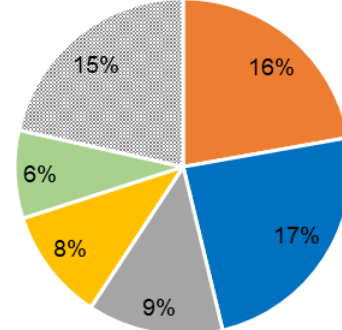

UM 8

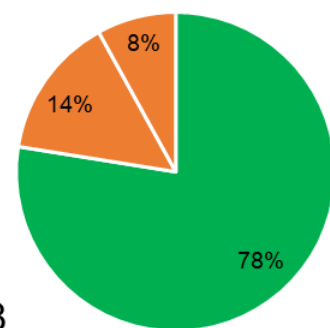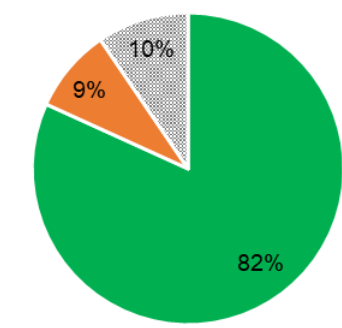

UM 9

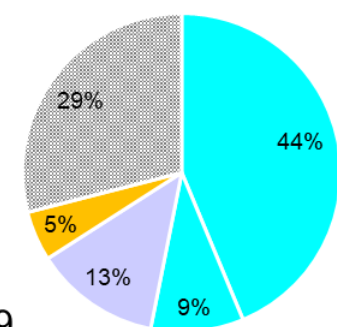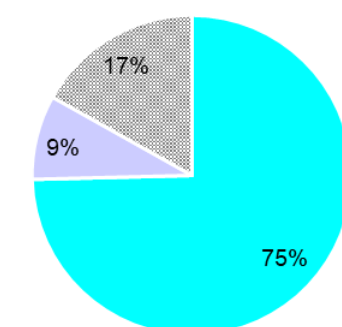

UM 11

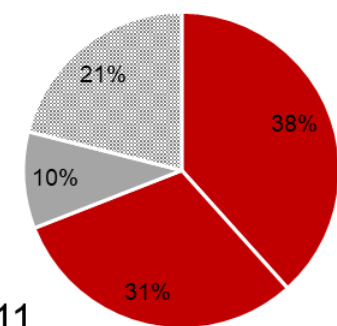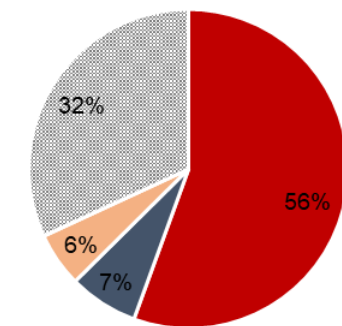

Supplement: msystems.00226-21-sf004.pdf [file msystems.00226-21-sf004.pdf]
