# Supplementary material for: Successful Profiling of Plasmodium falciparum var Gene Expression in Clinical Samples via a Custom Capture Array
Source: PubMed Central journal article supplement (PMC8631312; doi:10.1128/msystems.00226-21), 2021-11-30

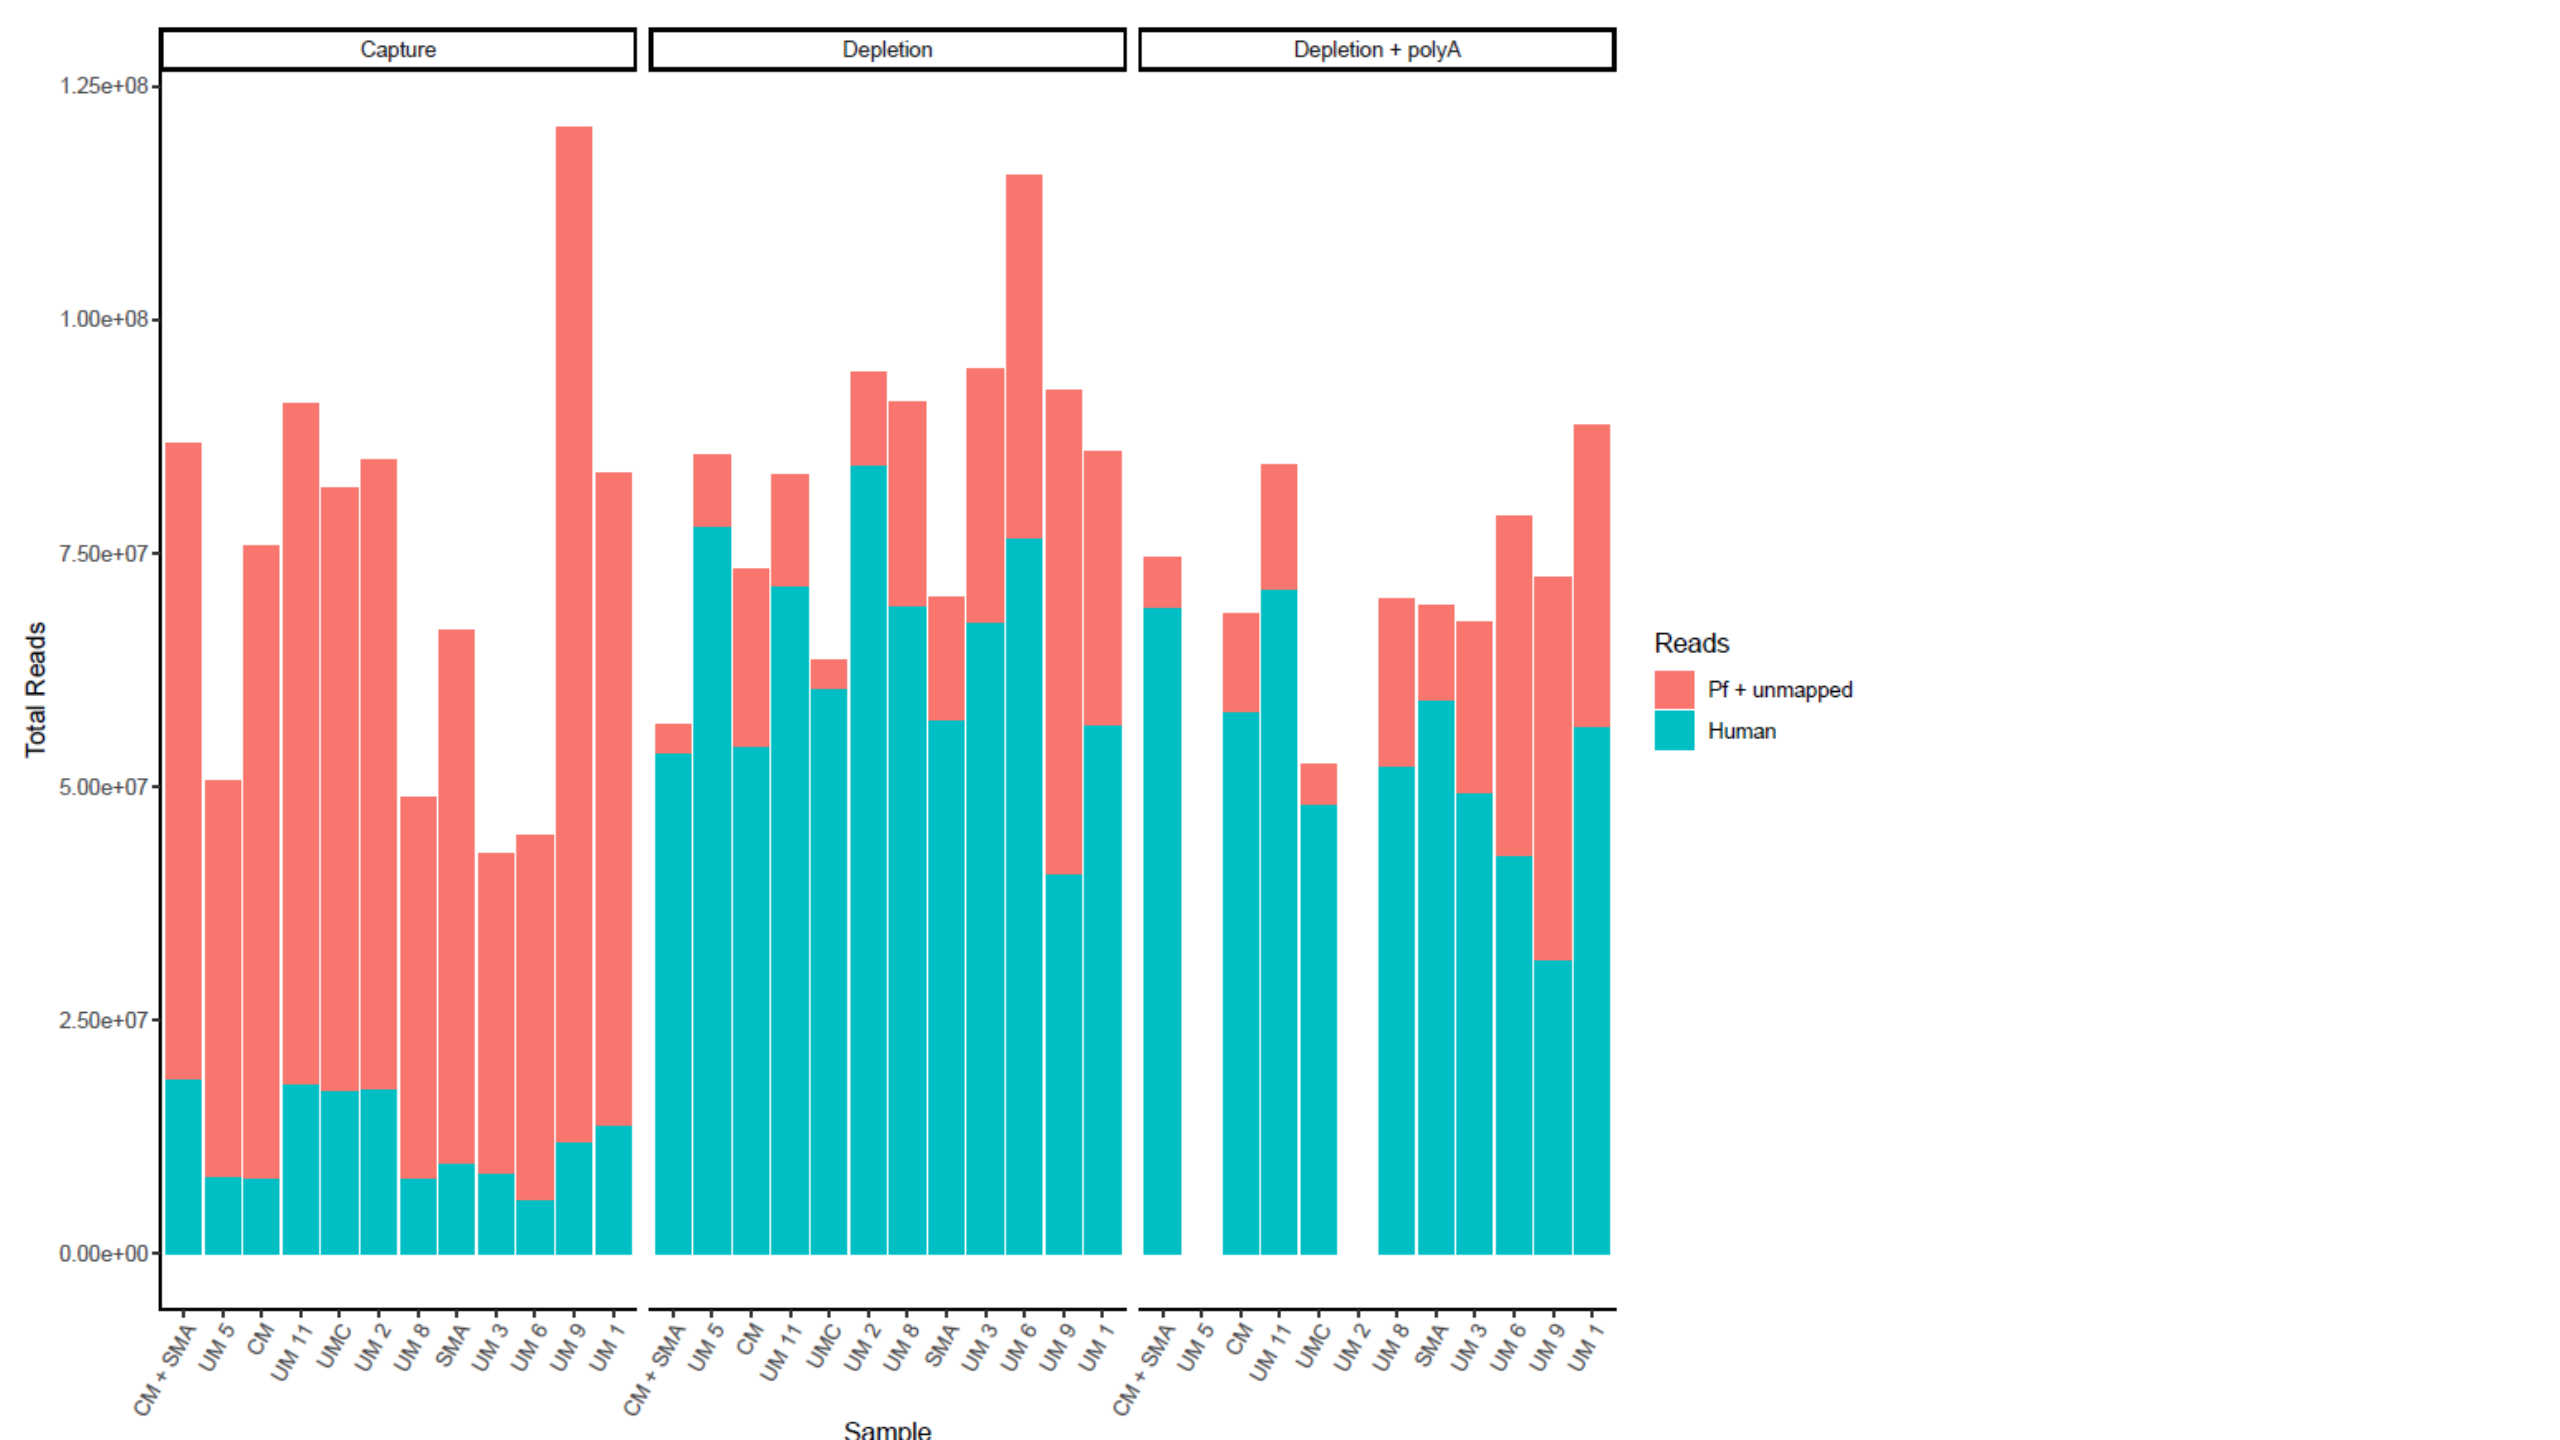

Supplement: msystems.00226-21-sf001.pdf [file msystems.00226-21-sf001.pdf]
